# Supplementary material
Source: Springer Nature journal article supplement (https://www.springermedizin.de/resource/supplementary/12879_2013_4163_MOESM2_ESM.pdf/9445954)
Supplement: MOESM2 [file 9445954]

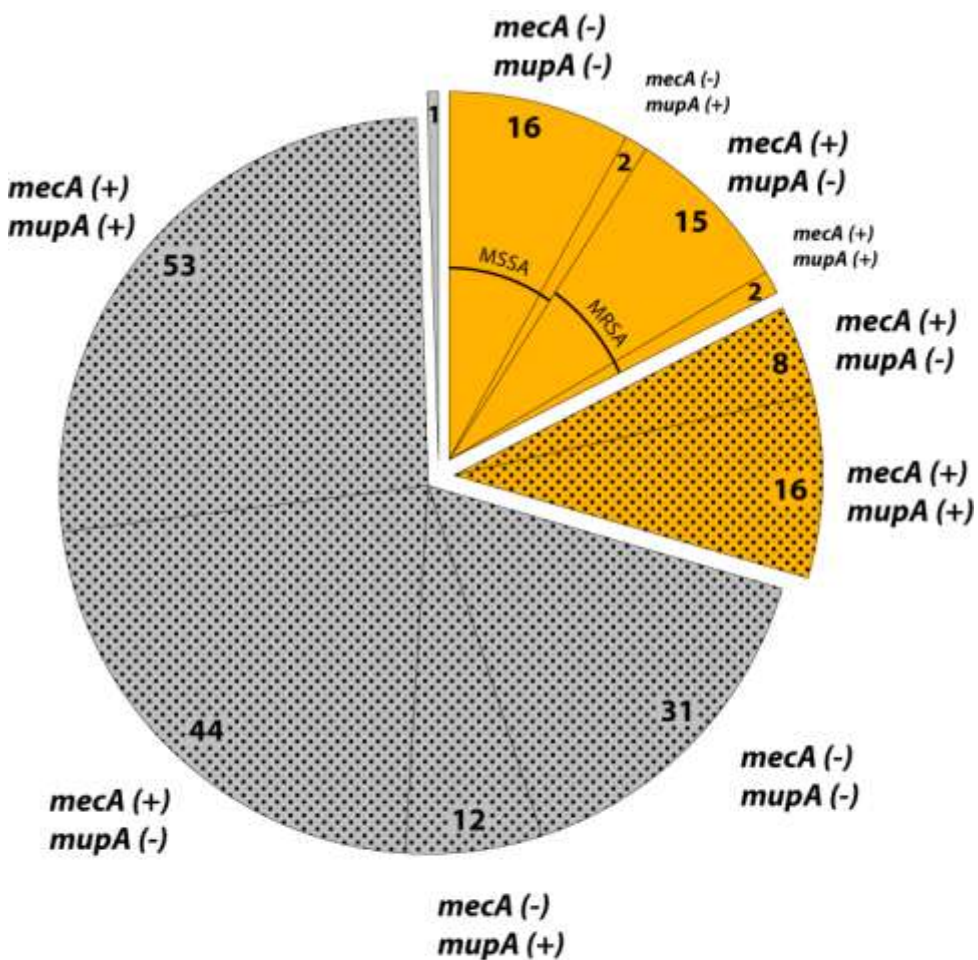

- S. aureus* only
- S. aureus* & coagulase-negative staphylococci
- Coagulase-negative staphylococci only
- No detection
